# Supplementary material for: Molecular Docking Identifies 1,8-Cineole (Eucalyptol) as A Novel PPARγ Agonist That Alleviates Colon Inflammation
Source: MDPI journal article supplement (doi:10.3390/ijms24076160), 2023-03-24
Supplement: s1 [file s1]

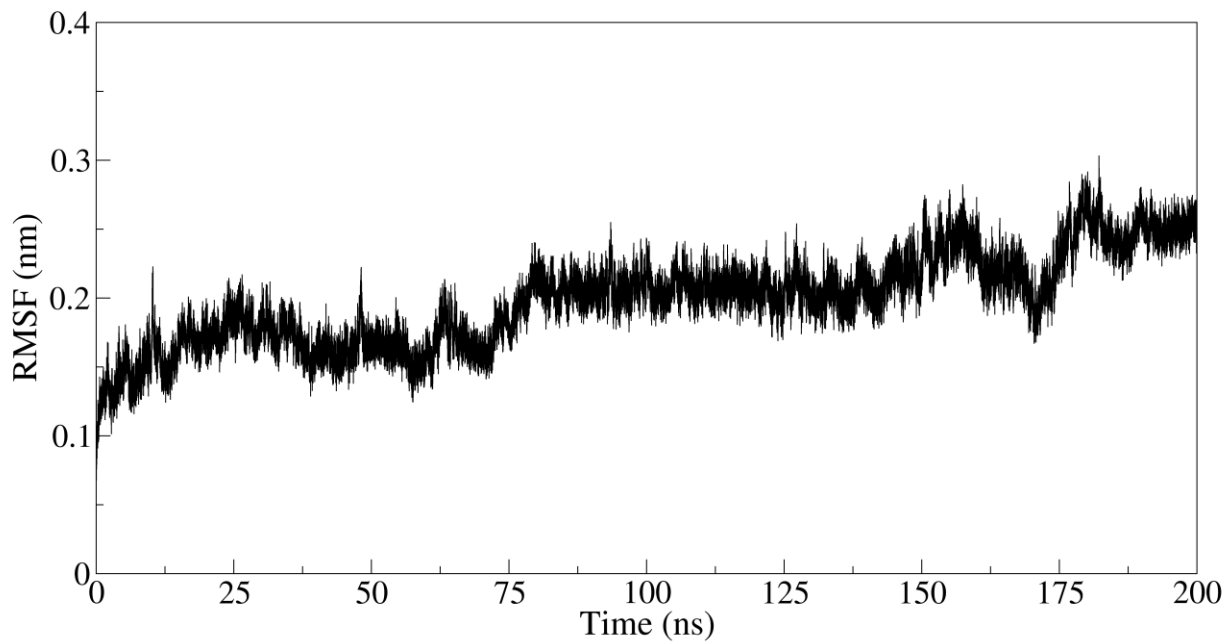

**Figure S1. RMSD in apo-PPAR- $\gamma$  backbone atoms**

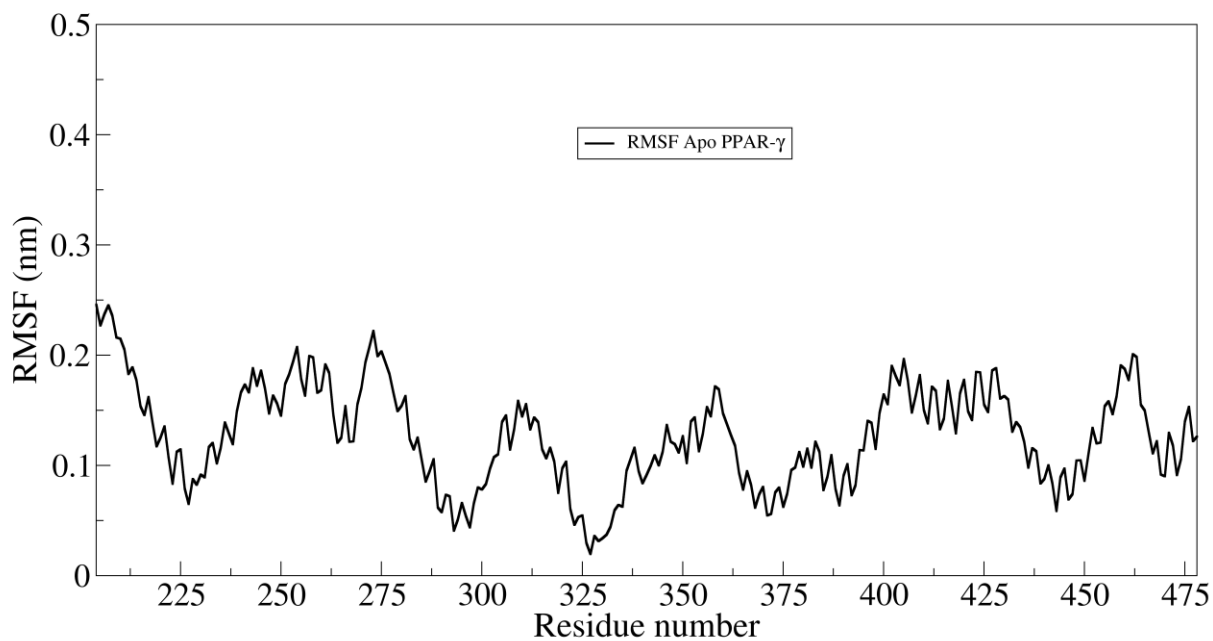

**Figure S2. RMSF in apo-PPAR- $\gamma$  residues**

**Disease activity index:**

The graph displays the Disease Activity Index (Y-axis, 0 to 4) against time points (X-axis). The Control group remains at 0. The DSS group shows a sharp increase after week 6, reaching approximately 3.8 by week 9. The DSS+G and DSS+L groups show moderate increases, reaching approximately 1.7 and 1.5 respectively by week 9. The DSS+G-L group shows a slight increase, reaching approximately 1.2 by week 9.

| Group   | Week 0 | Week 1 | Week 2 | Week 3 | Week 4 | Week 5 | Week 6 | Week 7 | Week 8 | Week 9 |
|---------|--------|--------|--------|--------|--------|--------|--------|--------|--------|--------|
| Control | 0      | 0      | 0      | 0      | 0      | 0      | 0      | 0      | 0      | 0      |
| DSS     | 0      | 0      | 0      | 0      | 0      | 0      | 0.2    | 0.5    | 1.2    | 3.8*** |
| DSS+G   | 0      | 0      | 0      | 0      | 0      | 0      | 0.2    | 0.5    | 1.2    | 1.7    |
| DSS+L   | 0      | 0      | 0      | 0      | 0      | 0      | 0.2    | 0.5    | 1.0    | 1.5    |
| DSS+G-L | 0      | 0      | 0      | 0      | 0      | 0      | 0.2    | 0.5    | 1.0    | 1.2    |

Legend:

- Control vs DSS \*\*\*  $p < 0.001$
- DSS vs Ctrl100 \*  $p < 0.05$
- DSS vs Ctrl200 \*\*  $p < 0.01$
- DSS vs SALZ \*  $p < 0.05$

[illegible]

| Control       | DSS                  | DSS+Cin100         | DSS+Cin200       | DSS+SAZ                    |
|---------------|----------------------|--------------------|------------------|----------------------------|
| 0.18099       | 0.6875361            | 0.409246878        | 0.269060634      | 0.440078567                |
| 0.217134      | 0.7751654            | 0.505105028        | 0.281463098      | 0.320335986                |
| 0.145844      | 0.40128              | 0.318879346        | 0.271425951      | 0.31045862                 |
| 0.181323      | 0.6213272            | 0.544410417        | 0.273983228      | 0.356957724                |
| 0.084242      | 0.5548352            | 0.115381017        | 0.124235949      | 0.143784573                |
| 0.15223       | 0.611789             | 0.322581           | 0.1955623        | 0.2988452                  |
| 0.175996      | 0.4778923            | 0.2899652          | 0.2447893        | 0.3614789                  |
| 0.200459      | 0.5422589            | 0.78125            | 0.174122         | 0.29665478                 |
|               |                      |                    |                  |                            |
|               |                      |                    |                  |                            |
|               |                      |                    |                  |                            |
| Table Anal    | DSS-Cin-MPO activity |                    |                  |                            |
| Data sets     | A-E                  |                    |                  |                            |
| ANOVA summary |                      |                    |                  |                            |
| F             | 16.19                |                    |                  |                            |
| P value       | <0.0001              |                    |                  |                            |
| P value su    | ****                 |                    |                  |                            |
| Significant   | Yes                  |                    |                  |                            |
| R squared     | 0.6492               |                    |                  |                            |
|               |                      |                    |                  |                            |
|               |                      |                    |                  |                            |
|               |                      |                    |                  |                            |
| ANOVA ta      | SS                   | DF                 | MS               | F (DFn, DFd) P value       |
| Treatment     | 0.8576               | 4                  | 0.2144           | F (4, 35) = 16.19 P<0.0001 |
| Residual (v   | 0.4634               | 35                 | 0.01324          |                            |
| Total         | 1.321                | 39                 |                  |                            |
|               |                      |                    |                  |                            |
| Data summary  |                      |                    |                  |                            |
| Number of     | 5                    |                    |                  |                            |
| Number of     | 40                   |                    |                  |                            |
|               |                      |                    |                  |                            |
|               |                      |                    |                  |                            |
|               |                      |                    |                  |                            |
| Number of     | 1                    |                    |                  |                            |
| Number of     | 10                   |                    |                  |                            |
| Alpha         | 0.05                 |                    |                  |                            |
|               |                      |                    |                  |                            |
|               |                      |                    |                  |                            |
| Tukey's m     | Mean Diff.           | 95.00% CI of diff. | Below threshold? | Summary Adjusted P Value   |
| Control vs.   | -0.4167              | -0.5821 to -0.2513 | Yes              | **** <0.0001 A-B           |
| Control vs.   | -0.2436              | -0.4090 to -0.0781 | Yes              | ** 0.0014 A-C              |
| Control vs.   | -0.06205             | -0.2275 to 0.1034  | No               | ns 0.8162 A-D              |
| Control vs.   | -0.1488              | -0.3142 to 0.0166  | No               | ns 0.095 A-E               |
| DSS vs. D     | 0.1732               | 0.007742 to 0.338  | Yes              | * 0.0364 B-C               |
| DSS vs. D     | 0.3547               | 0.1893 to 0.5201   | Yes              | **** <0.0001 B-D           |
| DSS vs. D     | 0.2679               | 0.1025 to 0.4334   | Yes              | *** 0.0004 B-E             |
| DSS+Cin1      | 0.1815               | 0.01611 to 0.3468  | Yes              | * 0.0256 C-D               |
| DSS+Cin1      | 0.09478              | -0.07064 to 0.2601 | No               | ns 0.4785 C-E              |
| DSS+Cin2      | -0.08674             | -0.2522 to 0.0786  | No               | ns 0.5645 D-E              |
|               |                      |                    |                  |                            |
| Test detail   | Mean 1               | Mean 2             | Mean Diff.       | SE of diff. n1 n2 q DF     |
| Control vs.   | 0.1673               | 0.584              | -0.4167          | 0.05753 8 8 10.24 35       |
| Control vs.   | 0.1673               | 0.4109             | -0.2436          | 0.05753 8 8 5.987 35       |
| Control vs.   | 0.1673               | 0.2293             | -0.06205         | 0.05753 8 8 1.525 35       |
| Control vs.   | 0.1673               | 0.3161             | -0.1488          | 0.05753 8 8 3.657 35       |
| DSS vs. D     | 0.584                | 0.4109             | 0.1732           | 0.05753 8 8 4.256 35       |
| DSS vs. D     | 0.584                | 0.2293             | 0.3547           | 0.05753 8 8 8.718 35       |
| DSS vs. D     | 0.584                | 0.3161             | 0.2679           | 0.05753 8 8 6.586 35       |
| DSS+Cin1      | 0.4109               | 0.2293             | 0.1815           | 0.05753 8 8 4.462 35       |
| DSS+Cin1      | 0.4109               | 0.3161             | 0.09478          | 0.05753 8 8 2.33 35        |
| DSS+Cin2      | 0.2293               | 0.3161             | -0.08674         | 0.05753 8 8 2.132 35       |

| Group      | MPO U/(mg of tissue) |
|------------|----------------------|
| Control    | ~0.18                |
| DSS        | ~0.58                |
| DSS+Cin100 | ~0.40                |
| DSS+Cin200 | ~0.22                |
| DSS+SAZ    | ~0.31                |

## Histology inflammation score:

| Control | DSS | DSS-Cin100 | DSS-Cin200 | DSS-SAZ |
|---------|-----|------------|------------|---------|
| 0       | 8   | 8          | 5          | 10      |
| 0       | 10  | 6          | 5          | 6       |
| 0       | 12  | 9          | 4          | 7       |
| 0       | 8   | 6          | 4          | 8       |
| 0       | 9   | 5          | 4          | 4       |
| 0       | 10  | 7          | 4          | 5       |
| 0       | 11  | 5          | 4          | 6       |
| 0       | 12  | 10         | 4          | 4       |
| 0       | 7   | 4          | 5          | 5       |
| 0       | 8   | 6          | 4          | 6       |
| 0       | 6   | 7          | 5          | 5       |
| 0       | 10  | 8          | 3          | 4       |
| 0       | 10  | 4          | 4          | 7       |
| 0       | 11  | 5          | 3          | 8       |
| 0       | 12  | 6          | 3          | 5       |
| 0       | 10  | 6          | 4          | 4       |
| 0       | 9   | 7          | 4          | 5       |
| 0       | 7   | 5          | 5          | 6       |
| 0       | 8   | 7          | 5          | 5       |
| 0       | 6   | 8          | 3          | 5       |
| 0       | 9   | 6          | 4          | 6       |
| 0       | 10  | 7          | 6          | 5       |
| 0       | 11  | 6          | 3          | 6       |
| 0       | 12  | 5          | 5          | 7       |

  

|                                               |                          |                 |             |                          |
|-----------------------------------------------|--------------------------|-----------------|-------------|--------------------------|
| Table Anal Histology-Colon inflammation score |                          |                 |             |                          |
| Data sets A-E                                 |                          |                 |             |                          |
| ANOVA summary                                 |                          |                 |             |                          |
| F                                             | 167                      |                 |             |                          |
| P value                                       | <0.0001                  |                 |             |                          |
| P value su                                    | ****                     |                 |             |                          |
| Significant                                   | Yes                      |                 |             |                          |
| R squared                                     | 0.8531                   |                 |             |                          |
| ANOVA ta SS                                   |                          |                 |             |                          |
| Treatment                                     | 1143                     | DF              | MS          | F (DFn, DFd) P value     |
| Residual (v                                   | 196.8                    |                 | 115         | F (4, 115) = 11 P<0.0001 |
| Total                                         | 1339                     |                 | 119         |                          |
| Data summary                                  |                          |                 |             |                          |
| Number of                                     | 5                        |                 |             |                          |
| Number of                                     | 120                      |                 |             |                          |
| Number of                                     |                          |                 |             |                          |
| Number of                                     | 1                        |                 |             |                          |
| Number of                                     | 10                       |                 |             |                          |
| Alpha                                         | 0.05                     |                 |             |                          |
| Tukey's m                                     |                          |                 |             |                          |
| Mean Diff.                                    | 95.00% CI of diff.       | Below threshold | Summary     | Adjusted P Value         |
| Control vs.                                   | -9.417 -10.46 to -8.370  | Yes             | ****        | <0.0001 A-B              |
| Control vs.                                   | -6.375 -7.421 to -5.329  | Yes             | ****        | <0.0001 A-C              |
| Control vs.                                   | -4.167 -5.213 to -3.120  | Yes             | ****        | <0.0001 A-D              |
| Control vs.                                   | -5.792 -6.838 to -4.745  | Yes             | ****        | <0.0001 A-E              |
| DSS vs. D                                     | 3.042 1.995 to 4.088     | Yes             | ****        | <0.0001 B-C              |
| DSS vs. D                                     | 5.25 4.204 to 6.296      | Yes             | ****        | <0.0001 B-D              |
| DSS vs. D                                     | 3.625 2.579 to 4.671     | Yes             | ****        | <0.0001 B-E              |
| DSS-Cin100                                    | 2.208 1.162 to 3.255     | Yes             | ****        | <0.0001 C-D              |
| DSS-Cin100                                    | 0.5833 -0.4632 to 1.630  | No              | ns          | 0.5357 C-E               |
| DSS-Cin200                                    | -1.625 -2.671 to -0.5785 | Yes             | ***         | 0.0003 D-E               |
| Test detail                                   |                          |                 |             |                          |
| Mean 1                                        | Mean 2                   | Mean Diff.      | SE of diff. | n1 n2 q DF               |
| Control vs.                                   | 0 9.417                  | -9.417          | 0.3776      | 24 24 35.27 115          |
| Control vs.                                   | 0 6.375                  | -6.375          | 0.3776      | 24 24 23.88 115          |
| Control vs.                                   | 0 4.167                  | -4.167          | 0.3776      | 24 24 15.61 115          |
| Control vs.                                   | 0 5.792                  | -5.792          | 0.3776      | 24 24 21.69 115          |
| DSS vs. D                                     | 9.417 6.375              | 3.042           | 0.3776      | 24 24 11.39 115          |
| DSS vs. D                                     | 9.417 4.167              | 5.25            | 0.3776      | 24 24 19.66 115          |
| DSS vs. D                                     | 9.417 5.792              | 3.625           | 0.3776      | 24 24 13.58 115          |
| DSS-Cin100                                    | 6.375 4.167              | 2.208           | 0.3776      | 24 24 8.271 115          |
| DSS-Cin100                                    | 6.375 5.792              | 0.5833          | 0.3776      | 24 24 2.185 115          |
| DSS-Cin200                                    | 4.167 5.792              | -1.625          | 0.3776      | 24 24 6.086 115          |

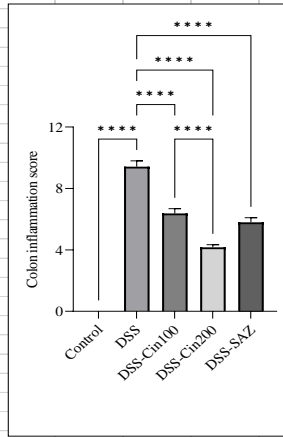

## DSS-Cin-IL6-ELISA:

| Control       | DSS               | DSS-Cin100        | DSS-Cin200       | DSS-SAZ                  |
|---------------|-------------------|-------------------|------------------|--------------------------|
| 25.38312      | 151.0334          | 36.61762          | 31.70833         | 37.1001                  |
| 33.89248      | 92.93752          | 42.48178          | 47.27477         | 36.35765                 |
| 27.53361      | 117.7063          | 67.44186          | 42.72671         | 43.51486                 |
| 37.84943      | 142.4505          | 59.17841          | 22.97464         | 55.73486                 |
| 14.50358      | 78.00801          | 75.62007          | 19.87972         | 53.37971                 |
| 16.62886      | 108.9013          | 66.9317           | 28.97226         | 43.32065                 |
| 11.12404      | 119.0233          | 49.3776           | 48.91726         | 62.4056                  |
| 12.33457      | 104.9249          | 47.62304          | 19.45899         | 46.82283                 |
|               |                   |                   |                  |                          |
|               |                   |                   |                  |                          |
| Table Anal    | DSS-Cin-IL6-ELISA |                   |                  |                          |
| Data sets     | A-E               |                   |                  |                          |
|               |                   |                   |                  |                          |
| ANOVA summary |                   |                   |                  |                          |
| F             | 46.56             |                   |                  |                          |
| P value       | <0.0001           |                   |                  |                          |
| P value su    | ****              |                   |                  |                          |
| Significant   | Yes               |                   |                  |                          |
| R squared     | 0.8418            |                   |                  |                          |
|               |                   |                   |                  |                          |
|               |                   |                   |                  |                          |
| ANOVA ta      | SS                | DF                | MS               | F (DFn, Df P value       |
| Treatment     | 41129             | 4                 | 10282            | F (4, 35) = P<0.0001     |
| Residual (v   | 7729              | 35                | 220.8            |                          |
| Total         | 48858             | 39                |                  |                          |
|               |                   |                   |                  |                          |
| Data summary  |                   |                   |                  |                          |
| Number of     | 5                 |                   |                  |                          |
| Number of     | 40                |                   |                  |                          |
|               |                   |                   |                  |                          |
|               |                   |                   |                  |                          |
| Number of     | 1                 |                   |                  |                          |
| Number of     | 10                |                   |                  |                          |
| Alpha         | 0.05              |                   |                  |                          |
|               |                   |                   |                  |                          |
| Tukey's m     | Mean Diff.        | 95.00% CI of diff | Below threshold? | Summary Adjusted P Value |
| Control vs.   | -91.97            | -113.3 to -70.61  | Yes              | **** <0.0001 A-B         |
| Control vs.   | -33.25            | -54.61 to -11.89  | Yes              | *** 0.0007 A-C           |
| Control vs.   | -10.33            | -31.69 to 11.03   | No               | ns 0.6375 A-D            |
| Control vs.   | -24.92            | -46.29 to -3.561  | Yes              | * 0.0155 A-E             |
| DSS vs. D     | 58.71             | 37.35 to 80.08    | Yes              | **** <0.0001 B-C         |
| DSS vs. D     | 81.63             | 60.27 to 103.0    | Yes              | **** <0.0001 B-D         |
| DSS vs. D     | 67.04             | 45.68 to 88.41    | Yes              | **** <0.0001 B-E         |
| DSS-C100      | 22.92             | 1.558 to 44.28    | Yes              | * 0.0304 C-D             |
| DSS-C100      | 8.329             | -13.03 to 29.69   | No               | ns 0.7944 C-E            |
| DSS-C200      | -14.59            | -35.95 to 6.771   | No               | ns 0.3044 D-E            |
|               |                   |                   |                  |                          |
| Test detail   | Mean 1            | Mean 2            | Mean Diff.       | SE of diff. n1 n2 q DF   |
| Control vs.   | 22.41             | 114.4             | -91.97           | 7.43 8 8 17.5 35         |
| Control vs.   | 22.41             | 55.66             | -33.25           | 7.43 8 8 6.329 35        |
| Control vs.   | 22.41             | 32.74             | -10.33           | 7.43 8 8 1.967 35        |
| Control vs.   | 22.41             | 47.33             | -24.92           | 7.43 8 8 4.744 35        |
| DSS vs. D     | 114.4             | 55.66             | 58.71            | 7.43 8 8 11.18 35        |
| DSS vs. D     | 114.4             | 32.74             | 81.63            | 7.43 8 8 15.54 35        |
| DSS vs. D     | 114.4             | 47.33             | 67.04            | 7.43 8 8 12.76 35        |
| DSS-C100      | 55.66             | 32.74             | 22.92            | 7.43 8 8 4.363 35        |
| DSS-C100      | 55.66             | 47.33             | 8.329            | 7.43 8 8 1.585 35        |
| DSS-C200      | 32.74             | 47.33             | -14.59           | 7.43 8 8 2.777 35        |

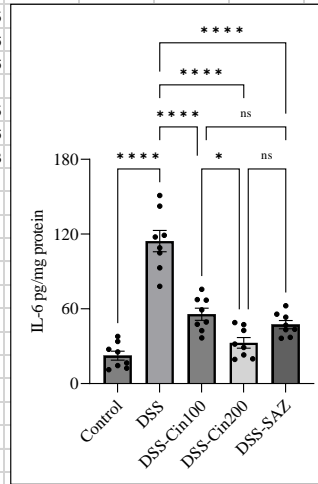

## DSS-Cin-IL-1 $\beta$ -ELISA:

| Control       | DSS                        | DSS-Cin100     | DSS-Cin200   | DSS-SAZ                  |
|---------------|----------------------------|----------------|--------------|--------------------------|
| 4.22          | 121.67                     | 54.99          | 23.14        | 48.12                    |
| 5.82          | 132.11                     | 76.63          | 48.99        | 68.22                    |
| 5.29          | 116.11                     | 62.19          | 27.42        | 41.22                    |
| 24.192        | 72.21                      | 34.17          | 53.9         | 72.92                    |
| 17.73         | 92.27                      | 73.62          | 23.28        | 68.72                    |
| 10.11         | 67.08                      | 43.18          | 41.43        | 43.67                    |
| 12.9          | 156.03                     | 36.18          | 63.49        | 42.9                     |
| 9.53          | 163.12                     | 56.22          | 34.65        | 65.11                    |
|               |                            |                |              |                          |
|               |                            |                |              |                          |
| Table Anal    | DSS-Cin-IL1 $\beta$ -ELISA |                |              |                          |
| Data sets     | A-E                        |                |              |                          |
| ANOVA summary |                            |                |              |                          |
| F             | 28.9                       |                |              |                          |
| P value       | <0.0001                    |                |              |                          |
| P value su    | ****                       |                |              |                          |
| Significant   | Yes                        |                |              |                          |
| R squared     | 0.7676                     |                |              |                          |
|               |                            |                |              |                          |
|               |                            |                |              |                          |
| ANOVA ta      | SS                         | DF             | MS           | F (DFn, Df) P value      |
| Treatment     | 46126                      | 4              | 11531        | F (4, 35) = P<0.0001     |
| Residual (v   | 13967                      | 35             | 399.1        |                          |
| Total         | 60093                      | 39             |              |                          |
|               |                            |                |              |                          |
| Data summary  |                            |                |              |                          |
| Number of     | 5                          |                |              |                          |
| Number of     | 40                         |                |              |                          |
|               |                            |                |              |                          |
|               |                            |                |              |                          |
| Number of     | 1                          |                |              |                          |
| Number of     | 10                         |                |              |                          |
| Alpha         | 0.05                       |                |              |                          |
|               |                            |                |              |                          |
| Tukey's m     | Mean Diff.                 | 95.00% CI of   | Below thresh | Summary Adjusted P Value |
| Control vs.   | -103.9                     | -132.6 to -75. | Yes          | **** <0.0001 A-B         |
| Control vs.   | -43.42                     | -72.14 to -14. | Yes          | ** 0.001 A-C             |
| Control vs.   | -28.31                     | -57.03 to 0.4  | No           | ns 0.0549 A-D            |
| Control vs.   | -45.14                     | -73.85 to -16. | Yes          | *** 0.0006 A-E           |
| DSS vs. D     | 60.43                      | 31.71 to 89.1  | Yes          | **** <0.0001 B-C         |
| DSS vs. D     | 75.54                      | 46.82 to 104.  | Yes          | **** <0.0001 B-D         |
| DSS vs. D     | 58.72                      | 30.00 to 87.4  | Yes          | **** <0.0001 B-E         |
| DSS-C100      | 15.11                      | -13.61 to 43.  | No           | ns 0.5614 C-D            |
| DSS-C100      | -1.713                     | -30.43 to 27.  | No           | ns 0.9998 C-E            |
| DSS-C200      | -16.82                     | -45.54 to 11.  | No           | ns 0.4564 D-E            |
|               |                            |                |              |                          |
| Test detail   | Mean 1                     | Mean 2         | Mean Diff.   | SE of diff. n1 n2 q DF   |
| Control vs.   | 11.22                      | 115.1          | -103.9       | 9.988 8 8 14.7 35        |
| Control vs.   | 11.22                      | 54.65          | -43.42       | 9.988 8 8 6.148 35       |
| Control vs.   | 11.22                      | 39.54          | -28.31       | 9.988 8 8 4.009 35       |
| Control vs.   | 11.22                      | 56.36          | -45.14       | 9.988 8 8 6.391 35       |
| DSS vs. D     | 115.1                      | 54.65          | 60.43        | 9.988 8 8 8.556 35       |
| DSS vs. D     | 115.1                      | 39.54          | 75.54        | 9.988 8 8 10.7 35        |
| DSS vs. D     | 115.1                      | 56.36          | 58.72        | 9.988 8 8 8.313 35       |
| DSS-C100      | 54.65                      | 39.54          | 15.11        | 9.988 8 8 2.139 35       |
| DSS-C100      | 54.65                      | 56.36          | -1.713       | 9.988 8 8 0.2425 35      |
| DSS-C200      | 39.54                      | 56.36          | -16.82       | 9.988 8 8 2.382 35       |

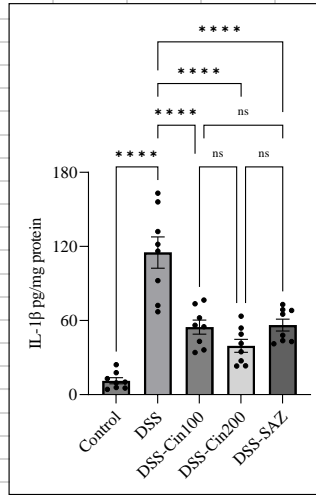

[illegible]



## DSS-Cin-IL17A-ELISA:

| Control  | DSS      | DSS-Cin100 | DSS-Cin200 | DSS-SAZ  |  |  |  |  |
|----------|----------|------------|------------|----------|--|--|--|--|
| 115.2609 | 362.9922 | 140.8297   | 234.6595   | 285.0894 |  |  |  |  |
| 114.3605 | 412.6884 | 385.7506   | 97.6083    | 194.3788 |  |  |  |  |
| 138.0362 | 391.6265 | 236.4721   | 175.1243   | 214.019  |  |  |  |  |
| 100.7928 | 489.5732 | 237.1874   | 179.1059   | 190.3755 |  |  |  |  |
| 134.6219 | 396.937  | 201.8706   | 168.4805   | 177.6509 |  |  |  |  |
| 105.0378 | 248.0007 | 288.6219   | 156.2287   | 253.4768 |  |  |  |  |
| 119.003  | 448.7728 | 267.3442   | 143.889    | 210.227  |  |  |  |  |
| 141.0028 | 379.266  | 192.2883   | 118.3427   | 178.992  |  |  |  |  |
|          |          |            |            |          |  |  |  |  |
|          |          |            |            |          |  |  |  |  |
|          |          |            |            |          |  |  |  |  |
|          |          |            |            |          |  |  |  |  |
|          |          |            |            |          |  |  |  |  |
|          |          |            |            |          |  |  |  |  |
|          |          |            |            |          |  |  |  |  |
|          |          |            |            |          |  |  |  |  |
|          |          |            |            |          |  |  |  |  |
|          |          |            |            |          |  |  |  |  |
|          |          |            |            |          |  |  |  |  |
|          |          |            |            |          |  |  |  |  |
|          |          |            |            |          |  |  |  |  |
|          |          |            |            |          |  |  |  |  |
|          |          |            |            |          |  |  |  |  |
|          |          |            |            |          |  |  |  |  |
|          |          |            |            |          |  |  |  |  |
|          |          |            |            |          |  |  |  |  |
|          |          |            |            |          |  |  |  |  |
|          |          |            |            |          |  |  |  |  |
|          |          |            |            |          |  |  |  |  |
|          |          |            |            |          |  |  |  |  |
|          |          |            |            |          |  |  |  |  |
|          |          |            |            |          |  |  |  |  |
|          |          |            |            |          |  |  |  |  |
|          |          |            |            |          |  |  |  |  |
|          |          |            |            |          |  |  |  |  |
|          |          |            |            |          |  |  |  |  |
|          |          |            |            |          |  |  |  |  |
|          |          |            |            |          |  |  |  |  |
|          |          |            |            |          |  |  |  |  |
|          |          |            |            |          |  |  |  |  |
|          |          |            |            |          |  |  |  |  |
|          |          |            |            |          |  |  |  |  |
|          |          |            |            |          |  |  |  |  |
|          |          |            |            |          |  |  |  |  |
|          |          |            |            |          |  |  |  |  |
|          |          |            |            |          |  |  |  |  |
|          |          |            |            |          |  |  |  |  |
|          |          |            |            |          |  |  |  |  |
|          |          |            |            |          |  |  |  |  |
|          |          |            |            |          |  |  |  |  |
|          |          |            |            |          |  |  |  |  |
|          |          |            |            |          |  |  |  |  |
|          |          |            |            |          |  |  |  |  |
|          |          |            |            |          |  |  |  |  |
|          |          |            |            |          |  |  |  |  |
|          |          |            |            |          |  |  |  |  |
|          |          |            |            |          |  |  |  |  |
|          |          |            |            |          |  |  |  |  |
|          |          |            |            |          |  |  |  |  |
|          |          |            |            |          |  |  |  |  |
|          |          |            |            |          |  |  |  |  |
|          |          |            |            |          |  |  |  |  |
|          |          |            |            |          |  |  |  |  |
|          |          |            |            |          |  |  |  |  |
|          |          |            |            |          |  |  |  |  |
|          |          |            |            |          |  |  |  |  |
|          |          |            |            |          |  |  |  |  |
|          |          |            |            |          |  |  |  |  |
|          |          |            |            |          |  |  |  |  |
|          |          |            |            |          |  |  |  |  |
|          |          |            |            |          |  |  |  |  |
|          |          |            |            |          |  |  |  |  |
|          |          |            |            |          |  |  |  |  |
|          |          |            |            |          |  |  |  |  |
|          |          |            |            |          |  |  |  |  |
|          |          |            |            |          |  |  |  |  |
|          |          |            |            |          |  |  |  |  |
|          |          |            |            |          |  |  |  |  |
|          |          |            |            |          |  |  |  |  |
|          |          |            |            |          |  |  |  |  |
|          |          |            |            |          |  |  |  |  |
|          |          |            |            |          |  |  |  |  |
|          |          |            |            |          |  |  |  |  |
|          |          |            |            |          |  |  |  |  |
|          |          |            |            |          |  |  |  |  |
|          |          |            |            |          |  |  |  |  |
|          |          |            |            |          |  |  |  |  |
|          |          |            |            |          |  |  |  |  |
|          |          |            |            |          |  |  |  |  |
|          |          |            |            |          |  |  |  |  |
|          |          |            |            |          |  |  |  |  |
|          |          |            |            |          |  |  |  |  |
|          |          |            |            |          |  |  |  |  |
|          |          |            |            |          |  |  |  |  |
|          |          |            |            |          |  |  |  |  |
|          |          |            |            |          |  |  |  |  |
|          |          |            |            |          |  |  |  |  |
|          |          |            |            |          |  |  |  |  |
|          |          |            |            |          |  |  |  |  |
|          |          |            |            |          |  |  |  |  |
|          |          |            |            |          |  |  |  |  |
|          |          |            |            |          |  |  |  |  |
|          |          |            |            |          |  |  |  |  |
|          |          |            |            |          |  |  |  |  |
|          |          |            |            |          |  |  |  |  |
|          |          |            |            |          |  |  |  |  |
|          |          |            |            |          |  |  |  |  |
|          |          |            |            |          |  |  |  |  |
|          |          |            |            |          |  |  |  |  |
|          |          |            |            |          |  |  |  |  |
|          |          |            |            |          |  |  |  |  |
|          |          |            |            |          |  |  |  |  |
|          |          |            |            |          |  |  |  |  |
|          |          |            |            |          |  |  |  |  |
|          |          |            |            |          |  |  |  |  |
|          |          |            |            |          |  |  |  |  |
|          |          |            |            |          |  |  |  |  |
|          |          |            |            |          |  |  |  |  |
|          |          |            |            |          |  |  |  |  |
|          |          |            |            |          |  |  |  |  |
|          |          |            |            |          |  |  |  |  |
|          |          |            |            |          |  |  |  |  |
|          |          |            |            |          |  |  |  |  |
|          |          |            |            |          |  |  |  |  |
|          |          |            |            |          |  |  |  |  |
|          |          |            |            |          |  |  |  |  |
|          |          |            |            |          |  |  |  |  |
|          |          |            |            |          |  |  |  |  |
|          |          |            |            |          |  |  |  |  |
|          |          |            |            |          |  |  |  |  |
|          |          |            |            |          |  |  |  |  |
|          |          |            |            |          |  |  |  |  |
|          |          |            |            |          |  |  |  |  |

|                                    |            |                 |                 |                           |                  |    |       |    |   |
|------------------------------------|------------|-----------------|-----------------|---------------------------|------------------|----|-------|----|---|
| <b>Control</b>                     | <b>DSS</b> | <b>DSS-C100</b> | <b>DSS-C200</b> | <b>DSS-SAZ</b>            |                  |    |       |    |   |
| 1                                  | 5.122      | 4.3889          | 2.2278          | 3.1178                    |                  |    |       |    |   |
| 1                                  | 6.367      | 3.0776          | 3.1187          | 3.2289                    |                  |    |       |    |   |
| 1                                  | 7.377      | 3.5279          | 2.6533          | 1.1167                    |                  |    |       |    |   |
| 1                                  | 5.299      | 2.3889          | 2.1189          | 1.9983                    |                  |    |       |    |   |
| 1                                  | 4.889      | 3.1997          | 1.9822          | 3.7782                    |                  |    |       |    |   |
| 1                                  | 7.299      | 2.9008          | 1.45            | 2.22899                   |                  |    |       |    |   |
|                                    |            |                 |                 |                           |                  |    |       |    |   |
|                                    |            |                 |                 |                           |                  |    |       |    |   |
|                                    |            |                 |                 |                           |                  |    |       |    |   |
|                                    |            |                 |                 |                           |                  |    |       |    |   |
| <b>Table Anal DSS-Cin-IL6-mRNA</b> |            |                 |                 |                           |                  |    |       |    |   |
| Repeated measures ANOVA summary    |            |                 |                 |                           |                  |    |       |    |   |
| Assume s <sub>i</sub>              | No         |                 |                 |                           |                  |    |       |    |   |
| F                                  | 32.55      |                 |                 |                           |                  |    |       |    |   |
| P value                            | <0.0001    |                 |                 |                           |                  |    |       |    |   |
| P value su                         | ****       |                 |                 |                           |                  |    |       |    |   |
| Statistical                        | Yes        |                 |                 |                           |                  |    |       |    |   |
| Geisser-G                          | 0.4638     |                 |                 |                           |                  |    |       |    |   |
| R squared                          | 0.8669     |                 |                 |                           |                  |    |       |    |   |
|                                    |            |                 |                 |                           |                  |    |       |    |   |
| Was the matching effective?        |            |                 |                 |                           |                  |    |       |    |   |
| F                                  | 0.5607     |                 |                 |                           |                  |    |       |    |   |
| P value                            | 0.7288     |                 |                 |                           |                  |    |       |    |   |
| P value su                         | ns         |                 |                 |                           |                  |    |       |    |   |
| Is there sig                       | No         |                 |                 |                           |                  |    |       |    |   |
| R squared                          | 0.01832    |                 |                 |                           |                  |    |       |    |   |
|                                    |            |                 |                 |                           |                  |    |       |    |   |
| ANOVA ta                           | SS         | DF              | MS              | F (DFn, DFd)              | P value          |    |       |    |   |
| Treatment                          | 84.85      | 4               | 21.21           | F (1.855, 9.27) P<0.0001  |                  |    |       |    |   |
| Individual (                       | 1.827      | 5               | 0.3654          | F (5, 20) = 0.51 P=0.7288 |                  |    |       |    |   |
| Residual (r                        | 13.03      | 20              | 0.6516          |                           |                  |    |       |    |   |
| Total                              | 99.71      | 29              |                 |                           |                  |    |       |    |   |
|                                    |            |                 |                 |                           |                  |    |       |    |   |
| Data summary                       |            |                 |                 |                           |                  |    |       |    |   |
| Number of                          | 5          |                 |                 |                           |                  |    |       |    |   |
| Number of                          | 6          |                 |                 |                           |                  |    |       |    |   |
| Number of                          | 0          |                 |                 |                           |                  |    |       |    |   |
|                                    |            |                 |                 |                           |                  |    |       |    |   |
| Number of                          | 1          |                 |                 |                           |                  |    |       |    |   |
| Number of                          | 10         |                 |                 |                           |                  |    |       |    |   |
| Alpha                              | 0.05       |                 |                 |                           |                  |    |       |    |   |
|                                    |            |                 |                 |                           |                  |    |       |    |   |
| Tukey's m                          | Mean Diff. | 95.00% CI of    | Below threshold | Summary                   | Adjusted P Value |    |       |    |   |
| Control vs.                        | -5.059     | -6.882 to -3.2  | Yes             | ***                       | 0.0006 A-B       |    |       |    |   |
| Control vs.                        | -2.247     | -3.351 to -1.1  | Yes             | **                        | 0.0024 A-C       |    |       |    |   |
| Control vs.                        | -1.258     | -2.198 to -0.3  | Yes             | *                         | 0.0156 A-D       |    |       |    |   |
| Control vs.                        | -1.578     | -3.174 to 0.0   | No              | ns                        | 0.0521 A-E       |    |       |    |   |
| DSS vs. D                          | 2.812      | 0.5647 to 5.0   | Yes             | *                         | 0.0206 B-C       |    |       |    |   |
| DSS vs. D                          | 3.8        | 1.814 to 5.78   | Yes             | **                        | 0.0032 B-D       |    |       |    |   |
| DSS vs. D                          | 3.481      | 0.3563 to 6.6   | Yes             | *                         | 0.033 B-E        |    |       |    |   |
| DSS-C100                           | 0.9888     | -0.3276 to 2.3  | No              | ns                        | 0.1336 C-D       |    |       |    |   |
| DSS-C100                           | 0.6692     | -1.080 to 2.4   | No              | ns                        | 0.5854 C-E       |    |       |    |   |
| DSS-C200                           | -0.3196    | -2.172 to 1.5   | No              | ns                        | 0.9498 D-E       |    |       |    |   |
|                                    |            |                 |                 |                           |                  |    |       |    |   |
| Test detail                        | Mean 1     | Mean 2          | Mean Diff.      | SE of diff.               | n1               | n2 | q     | DF |   |
| Control vs.                        | 1          | 6.059           | -5.059          | 0.4544                    | 6                | 6  | 15.74 | 5  | 9 |
| Control vs.                        | 1          | 3.247           | -2.247          | 0.2751                    | 6                | 6  | 11.55 | 5  | 9 |
| Control vs.                        | 1          | 2.258           | -1.258          | 0.2343                    | 6                | 6  | 7.598 | 5  | 9 |
| Control vs.                        | 1          | 2.578           | -1.578          | 0.3979                    | 6                | 6  | 5.609 | 5  | 9 |
| DSS vs. D                          | 6.059      | 3.247           | 2.812           | 0.5601                    | 6                | 6  | 7.099 | 5  | 9 |
| DSS vs. D                          |            |                 |                 |                           |                  |    |       |    |   |

### DSS-Cin-IL-1 $\beta$ -mRNA:

[illegible]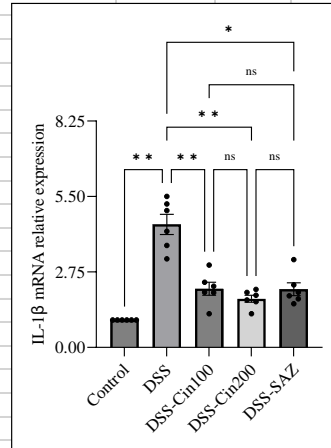

### DSS-Cin-TNF $\alpha$ -mRNA:

[illegible]

| Control | DSS    | DSS-Cin100 | DSS-Cin200 | DSS-SAZ |
|---------|--------|------------|------------|---------|
| 1       | 4.226  | 3.2298     | 1.88276    | 2.3778  |
| 1       | 5.3387 | 2.3778     | 1.66773    | 3.27783 |
| 1       | 6.3889 | 2.8836     | 2.00938    | 3.99287 |
| 1       | 4.3387 | 3.9987     | 2.2276     | 1.9997  |
| 1       | 3.9982 | 2.2356     | 1.47728    | 1.366   |
| 1       | 4.9983 | 1.9927     | 1.3889     | 1.667   |

IL-17A Relative mRNA expression

| Group      | Mean Expression | Significance vs DSS |
|------------|-----------------|---------------------|
| Control    | ~1.0            | -                   |
| DSS        | ~5.0            | -                   |
| DSS-Cin100 | ~3.0            | *                   |
| DSS-Cin200 | ~1.5            | *                   |
| DSS-SAZ    | ~2.5            | ns                  |

| Table Anal DSS-Cin-IL17-mRNA    |        |
|---------------------------------|--------|
| Repeated measures ANOVA summary |        |
| Assume s No                     |        |
| F                               | 33.61  |
| P value                         | 0.0002 |
| P value su                      | ***    |
| Statistical Yes                 |        |
| Geisser-G                       | 0.4023 |
| R squared                       | 0.8705 |

  

| Was the matching effective? |         |
|-----------------------------|---------|
| F                           | 2.514   |
| P value                     | 0.0638  |
| P value su                  | ns      |
| Is there sig                | No      |
| R squared                   | 0.07528 |

  

| ANOVA ta     | SS    | DF | MS     | F (DFn, DFd)   | P value  |
|--------------|-------|----|--------|----------------|----------|
| Treatment    | 51    | 4  | 12.75  | F (1.609, 8.0) | P=0.0002 |
| Individual ( | 4.77  | 5  | 0.9539 | F (5, 20) = 2  | P=0.0638 |
| Residual (r  | 7.588 | 20 | 0.3794 |                |          |
| Total        | 63.36 | 29 |        |                |          |

  

| Data summary |   |
|--------------|---|
| Number of    | 5 |
| Number of    | 6 |
| Number of    | 0 |

  

| Number of | 1    |
|-----------|------|
| Number of | 10   |
| Alpha     | 0.05 |

  

| Tukey's m   | Mean Diff. | 95.00% CI of dif | Below threshold? | Summary | Adjusted P Value |
|-------------|------------|------------------|------------------|---------|------------------|
| Control vs. | -3.881     | -5.346 to -2.417 | Yes              | ***     | 0.0007 A-B       |
| Control vs. | -1.786     | -3.007 to -0.566 | Yes              | *       | 0.0106 A-C       |
| Control vs. | -0.7756    | -1.304 to -0.247 | Yes              | *       | 0.0105 A-D       |
| Control vs. | -1.447     | -3.095 to 0.200  | No               | ns      | 0.08 A-E         |
| DSS vs. D   | 2.095      | 0.02800 to 4.16  | Yes              | *       | 0.0475 B-C       |
| DSS vs. D   | 3.106      | 1.621 to 4.590   | Yes              | **      | 0.0021 B-D       |
| DSS vs. D   | 2.435      | 1.588 to 3.282   | Yes              | ***     | 0.0005 B-E       |
| DSS-Cin10   | 1.011      | 0.2676 to 1.754  | Yes              | *       | 0.0146 C-D       |
| DSS-Cin10   | 0.3395     | -1.589 to 2.268  | No               | ns      | 0.9464 C-E       |
| DSS-Cin20   | -0.6713    | -2.174 to 0.831  | No               | ns      | 0.4649 D-E       |

  

| Test detail | Mean 1 | Mean 2 | Mean Diff. | SE of diff. | n1 | n2 | q      | DF |
|-------------|--------|--------|------------|-------------|----|----|--------|----|
| Control vs. | 1      | 4.881  | -3.881     | 0.3651      | 6  | 6  | 15.03  | 5  |
| Control vs. | 1      | 2.786  | -1.786     | 0.3042      | 6  | 6  | 8.305  | 5  |
| Control vs. | 1      | 1.776  | -0.7756    | 0.1317      | 6  | 6  | 8.327  | 5  |
| Control vs. | 1      | 2.447  | -1.447     | 0.4108      | 6  | 6  | 4.981  | 5  |
| DSS vs. D   | 4.881  | 2.786  | 2.095      | 0.5153      | 6  | 6  | 5.75   | 5  |
| DSS vs. D   | 4.881  | 1.776  | 3.106      | 0.3701      | 6  | 6  | 11.87  | 5  |
| DSS vs. D   | 4.881  | 2.447  | 2.435      | 0.2111      | 6  | 6  | 16.31  | 5  |
| DSS-Cin10   | 2.786  | 1.776  | 1.011      | 0.1853      | 6  | 6  | 7.716  | 5  |
| DSS-Cin10   | 2.786  | 2.447  | 0.3395     | 0.4807      | 6  | 6  | 0.9987 | 5  |
| DSS-Cin20   | 1.776  | 2.447  | -0.6713    | 0.3746      | 6  | 6  | 2.534  | 5  |

### DSS-Cin-COX2 protein and mRNA:

[illegible]

**DSS-Cin-Keap1, Nrf2 protein:**

|                                                                                   |                            |            |            |                      |                                                                                    |          |            |            |                      |
|-----------------------------------------------------------------------------------|----------------------------|------------|------------|----------------------|------------------------------------------------------------------------------------|----------|------------|------------|----------------------|
| Control                                                                           | DSS                        | DSS-Cin100 | DSS-Cin200 |                      | Control                                                                            | DSS      | DSS-Cin100 | DSS-Cin200 |                      |
| 0.658177                                                                          | 1.16595                    | 0.918419   | 0.972059   |                      | 0.44442                                                                            | 0.269811 | 0.755048   | 1.858767   |                      |
| 0.489079                                                                          | 0.994904                   | 0.609635   | 0.873918   |                      | 0.436189                                                                           | 0.568749 | 0.867555   | 1.66965    |                      |
| 0.481106                                                                          | 0.913083                   | 0.966696   | 0.745264   |                      | 0.357631                                                                           | 0.563747 | 0.784555   | 1.834917   |                      |
|                                                                                   |                            |            |            |                      | 0.473034                                                                           | 0.469346 | 0.767393   | 1.166955   |                      |
| <b>Keap-1 Western</b>                                                             |                            |            |            |                      | <b>Nuclear Nr12</b>                                                                |          |            |            |                      |
| Table Anal DSS-Cin-Keap1                                                          |                            |            |            |                      | Table Anal DSS-Cin-Nuclear-Nr12                                                    |          |            |            |                      |
| Data sets A-D                                                                     |                            |            |            |                      | Data sets A-D                                                                      |          |            |            |                      |
| ANOVA summary                                                                     |                            |            |            |                      | ANOVA summary                                                                      |          |            |            |                      |
| F                                                                                 | 6.259                      |            |            |                      | F                                                                                  | 3.212    |            |            |                      |
| P value                                                                           | 0.0171                     |            |            |                      | P value                                                                            | 0.0617   |            |            |                      |
| P value su *                                                                      |                            |            |            |                      | P value su ns                                                                      |          |            |            |                      |
| Significant: Yes                                                                  |                            |            |            |                      | Significant: No                                                                    |          |            |            |                      |
| R squared                                                                         | 0.7012                     |            |            |                      | R squared                                                                          | 0.4454   |            |            |                      |
| 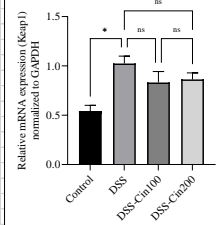 |                            |            |            |                      |  |          |            |            |                      |
| ANOVA ta SS                                                                       |                            |            |            |                      | ANOVA ta SS                                                                        |          |            |            |                      |
| Treatment                                                                         | 0.3621                     | 3          | 0.1207     | F (DFn, DfP value    | Treatment                                                                          | 0.3014   | 3          | 0.1005     | F (3, 12) = P=0.0617 |
| Residual (i                                                                       | 0.1543                     | 8          | 0.01928    | F (3, 8) = (P=0.0171 | Residual (i                                                                        | 0.3754   | 12         | 0.03128    |                      |
| Total                                                                             | 0.5164                     | 11         |            |                      | Total                                                                              | 0.6768   | 15         |            |                      |
| Data summary                                                                      |                            |            |            |                      | Data summary                                                                       |          |            |            |                      |
| Number of                                                                         | 4                          |            |            |                      | Number of                                                                          | 4        |            |            |                      |
| Number of                                                                         | 12                         |            |            |                      | Number of                                                                          | 16       |            |            |                      |
| Number of                                                                         | 1                          |            |            |                      | Number of                                                                          | 1        |            |            |                      |
| Number of                                                                         | 6                          |            |            |                      | Number of                                                                          | 6        |            |            |                      |
| Alpha                                                                             | 0.05                       |            |            |                      | Alpha                                                                              | 0.05     |            |            |                      |
| Tukey's m Mean Diff. 95.00% CI of diff. Below threshold?                          |                            |            |            |                      | Tukey's m Mean Diff. 95.00% CI of di Below threshold?                              |          |            |            |                      |
| Control vs.                                                                       | -0.4819 -0.8450 to -0.1188 | Yes        |            | Summary              | Adjusted P Value                                                                   |          |            |            |                      |
| Control vs.                                                                       | -0.2888 -0.6519 to 0.0743  | No         | ns         |                      | 0.012 A-B                                                                          |          |            |            |                      |
| Control vs.                                                                       | -0.321 -0.6841 to 0.0421   | No         | ns         |                      | 0.0845 A-D                                                                         |          |            |            |                      |
| DSS vs. D                                                                         | 0.1931 -0.1700 to 0.5562   | No         | ns         |                      | 0.3817 B-C                                                                         |          |            |            |                      |
| DSS vs. D                                                                         | 0.1609 -0.2022 to 0.5240   | No         | ns         |                      | 0.5227 B-D                                                                         |          |            |            |                      |
| DSS-Cin1C                                                                         | -0.0322 -0.3953 to 0.3309  | No         | ns         |                      | 0.9914 C-D                                                                         |          |            |            |                      |
| Test detail: Mean 1 Mean 2 Mean Diff. SE of diff. n1 n2 q DF                      |                            |            |            |                      | Test detail: Mean 1 Mean 2 Mean Diff. SE of diff. n1 n2 q DF                       |          |            |            |                      |
| Control vs.                                                                       | 0.5428                     | 1.025      | 0.1134     | 3                    | 3                                                                                  | 6.01     | 8          |            |                      |
| Control vs.                                                                       | 0.5428                     | 0.8316     | -0.2888    | 0.1134               | 3                                                                                  | 3        | 3.602      | 8          |                      |
| Control vs.                                                                       | 0.5428                     | 0.8637     | -0.321     | 0.1134               | 3                                                                                  | 3        | 4.003      | 8          |                      |
| DSS vs. D                                                                         | 1.025                      | 0.8316     | 0.1931     | 0.1134               | 3                                                                                  | 3        | 2.408      | 8          |                      |
| DSS vs. D                                                                         | 1.025                      | 0.8637     | 0.1609     | 0.1134               | 3                                                                                  | 3        | 2.007      | 8          |                      |
| DSS-Cin1C                                                                         | 0.8316                     | 0.8637     | -0.0322    | 0.1134               | 3                                                                                  | 3        | 0.4016     | 8          |                      |
| ANOVA ta SS                                                                       |                            |            |            |                      | ANOVA ta SS                                                                        |          |            |            |                      |
| Treatment                                                                         | 0.3014                     | 3          | 0.1005     | F (3, 12) = P=0.0617 | Treatment                                                                          | 0.3014   | 3          | 0.1005     | F (3, 12) = P=0.0617 |
| Residual (i                                                                       | 0.3754                     | 12         | 0.03128    |                      | Residual (i                                                                        | 0.3754   | 12         | 0.03128    |                      |
| Total                                                                             | 0.6768                     | 15         |            |                      | Total                                                                              | 0.6768   | 15         |            |                      |
| Data summary                                                                      |                            |            |            |                      | Data summary                                                                       |          |            |            |                      |
| Number of                                                                         | 4                          |            |            |                      | Number of                                                                          | 4        |            |            |                      |
| Number of                                                                         | 16                         |            |            |                      | Number of                                                                          | 16       |            |            |                      |
| Number of                                                                         | 1                          |            |            |                      | Number of                                                                          | 1        |            |            |                      |
| Number of                                                                         | 6                          |            |            |                      | Number of                                                                          | 6        |            |            |                      |
| Alpha                                                                             | 0.05                       |            |            |                      | Alpha                                                                              | 0.05     |            |            |                      |
| Tukey's m Mean Diff. 95.00% CI of di Below threshold?                             |                            |            |            |                      | Tukey's m Mean Diff. 95.00% CI of di Below threshold?                              |          |            |            |                      |
| Control vs.                                                                       | -0.1378 -0.2335 to 0.501   | No         | ns         | Summary              | Adjusted P Value                                                                   |          |            |            |                      |
| Control vs.                                                                       | -0.04791 -0.4192 to 0.321  | No         | ns         |                      | 0.6954                                                                             |          |            |            |                      |
| Control vs.                                                                       | -0.2452 -0.6165 to 0.121   | No         | ns         |                      | 0.98                                                                               |          |            |            |                      |
| DSS vs. D                                                                         | -0.1857 -0.5569 to 0.181   | No         | ns         |                      | 0.2553                                                                             |          |            |            |                      |
| DSS vs. D                                                                         | -0.383 -0.7542 to -0.01    | Yes        | *          |                      | 0.4756                                                                             |          |            |            |                      |
| DSS-Cin1C                                                                         | -0.1973 -0.5686 to 0.171   | No         | ns         |                      | 0.0425                                                                             |          |            |            |                      |
| Test detail: Mean 1 Mean 2 Mean Diff. SE of diff. n1 n2 q DF                      |                            |            |            |                      | Test detail: Mean 1 Mean 2 Mean Diff. SE of diff. n1 n2 q DF                       |          |            |            |                      |
| Control vs.                                                                       | 0.5409                     | 0.4032     | 0.1378     | 0.1251               | 4                                                                                  | 4        | 1.558      | 12         |                      |
| Control vs.                                                                       | 0.5409                     | 0.5888     | -0.04791   | 0.1251               | 4                                                                                  | 4        | 0.5417     | 12         |                      |
| Control vs.                                                                       | 0.5409                     | 0.7861     | -0.2452    | 0.1251               | 4                                                                                  | 4        | 2.773      | 12         |                      |
| DSS vs. D                                                                         | 0.4032                     | 0.5888     | -0.1857    | 0.1251               | 4                                                                                  | 4        | 2.099      | 12         |                      |
| DSS vs. D                                                                         | 0.4032                     | 0.7861     | -0.383     | 0.1251               | 4                                                                                  | 4        | 4.331      | 12         |                      |
| DSS-Cin1C                                                                         | 0.5888                     | 0.7861     | -0.1973    | 0.1251               | 4                                                                                  | 4        | 2.231      | 12         |                      |
| ANOVA ta SS                                                                       |                            |            |            |                      | ANOVA ta SS                                                                        |          |            |            |                      |
| Treatment                                                                         | 0.3753                     | 3          | 0.1251     | F (3, 12) = P=0.0034 | Treatment                                                                          | 0.3753   | 3          | 0.1251     | F (3, 12) = P=0.0034 |
| Residual (i                                                                       | 0.07367                    | 3          | 0.02456    | F (3, 9) = (P=0.5688 | Residual (i                                                                        | 0.07367  | 3          | 0.02456    | F (3, 9) = (P=0.5688 |
| Total                                                                             | 0.449                      | 6          |            |                      | Total                                                                              | 0.449    | 6          |            |                      |
| Data summary                                                                      |                            |            |            |                      | Data summary                                                                       |          |            |            |                      |
| Number of                                                                         | 4                          |            |            |                      | Number of                                                                          | 4        |            |            |                      |
| Number of                                                                         | 4                          |            |            |                      | Number of                                                                          | 4        |            |            |                      |
| Number of                                                                         | 0                          |            |            |                      | Number of                                                                          | 0        |            |            |                      |
| Number of                                                                         | 1                          |            |            |                      | Number of                                                                          | 1        |            |            |                      |
| Alpha                                                                             | 0.05                       |            |            |                      | Alpha                                                                              | 0.05     |            |            |                      |
| Tukey's m Mean Diff. 95.00% CI Below thre                                         |                            |            |            |                      | Tukey's m Mean Diff. 95.00% CI Below thre                                          |          |            |            |                      |
| Control vs.                                                                       | -0.04009 -0.4441 to No     | ns         |            | Summary              | Adjusted P Value                                                                   |          |            |            |                      |
| Control vs.                                                                       | -0.3658 -0.5430 to Yes     | **         |            |                      | 0.9589 A-B                                                                         |          |            |            |                      |
| Control vs.                                                                       | -1.205 -2.063 to -0.346    | *          |            |                      | 0.0065 A-C                                                                         |          |            |            |                      |
| DSS vs. D                                                                         | -0.3257 -0.5971 to -0.0544 | *          |            |                      | 0.0198 A-D                                                                         |          |            |            |                      |
| DSS vs. D                                                                         | -0.3257 -0.5971 to -0.0544 | *          |            |                      | 0.0305 B-D                                                                         |          |            |            |                      |
| DSS vs. D                                                                         | -1.165 -2.061 to -0.269    | *          |            |                      | 0.0245 B-D                                                                         |          |            |            |                      |
| DSS-Cin1C                                                                         | -0.8389 -1.614 to -0.063   | *          |            |                      | 0.0245 C-D                                                                         |          |            |            |                      |
| Test detail: Mean 1 Mean 2 Mean Diff. SE of diff. n1 n2 q DF                      |                            |            |            |                      | Test detail: Mean 1 Mean 2 Mean Diff. SE of diff. n1 n2 q DF                       |          |            |            |                      |
| Control vs.                                                                       | 0.4278                     | 0.4679     | -0.04009   | 0.08373              | 4                                                                                  | 4        | 0.6772     | 3          |                      |
| Control vs.                                                                       | 0.4278                     | 0.7936     | -0.3658    | 0.03672              | 4                                                                                  | 4        | 14.09      | 3          |                      |
| Control vs.                                                                       | 0.4278                     | 1.633      | -1.205     | 0.1779               | 4                                                                                  | 4        | 9.575      | 3          |                      |
| DSS vs. D                                                                         | 0.4679                     | 0.7936     | -0.3257    | 0.05623              | 4                                                                                  | 4        | 8.192      | 3          |                      |
| DSS vs. D                                                                         | 0.4679                     | 1.633      | -1.165     | 0.1856               | 4                                                                                  | 4        | 8.872      | 3          |                      |
| DSS-Cin1C                                                                         | 0.7936                     | 1.633      | -0.8389    | 0.1605               | 4                                                                                  | 4        | 7.391      | 3          |                      |

**Table Anal DSS-Cin-HO1-Western**  
Data sets :A-D

| Control  | DSS      | DSS-Cin100 | DSS-Cin200 |
|----------|----------|------------|------------|
| 0.876514 | 0.588663 | 0.551396   | 0.90663    |
| 0.857208 | 0.519801 | 0.504068   | 0.688507   |
| 0.604483 | 0.356882 | 0.450949   | 0.674108   |
| 0.981146 | 0.330014 | 0.911198   | 0.866003   |

**Table Anal DSS-Cin-NQO1-mRNA**  
Data sets :A-D

| Control | DSS  | DSS-Cin100 | DSS-Cin200 |
|---------|------|------------|------------|
| 1       | 0.72 | 1.11       | 1.5002     |
| 1       | 0.66 | 0.9166     | 2.124      |
| 1       | 0.68 | 0.9        | 1.887      |
| 1       | 0.55 | 0.5874     | 2.11       |
| 1       | 0.61 | 1.1        | 1.89       |
| 1       | 0.45 | 0.792      | 1.8833     |

**Table Anal DSS-Cin-HO1-Western**  
Data sets :A-D

| Control  | DSS      | DSS-Cin100 | DSS-Cin200 |
|----------|----------|------------|------------|
| 1.011109 | 0.308428 | 0.582038   | 0.932501   |
| 0.85943  | 0.416965 | 0.474177   | 0.705512   |
| 0.867602 | 0.520347 | 0.631576   | 0.80086    |

**Table Anal DSS-Cin-HO1-mRNA**  
Data sets :A-D

| Control | DSS    | DSS-Cin100 | DSS-Cin200 |
|---------|--------|------------|------------|
| 1       | 0.84   | 1.882      | 2.9002     |
| 1       | 0.886  | 1.566      | 3.124      |
| 1       | 0.5667 | 1.277      | 2.288      |
| 1       | 0.75   | 1.2209     | 3.7566     |
| 1       | 0.9553 | 2.366      | 3.15       |
| 1       | 0.66   | 0.8276     | 2.7833     |



[illegible]

### HT-29-Cell viability, IL8 & CXCL-1 mRNA:

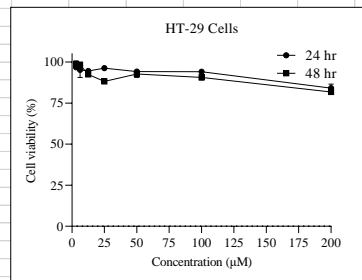

|          | Control | TNF   | TNF-Cin40 | Cin40 |
|----------|---------|-------|-----------|-------|
| IL8-mRNA | 1       | 3.6   | 1.819     | 1.195 |
|          | 1       | 4.599 | 2.183     | 1.016 |
|          | 1       | 3.031 | 1.292     | 0.91  |
|          | 1       | 5.751 | 2.7981    | 1.19  |
|          | 1       | 2.99  | 2.579     | 0.964 |
|          | 1       | 3.18  | 1.256     | 1.077 |

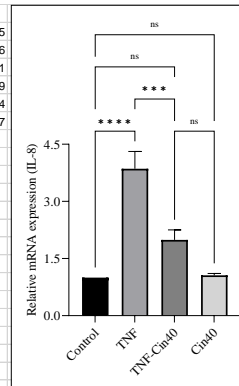Table Anal HT-29-IL8-mRNA

|                 |
|-----------------|
| Data sets : A-D |
|-----------------|

|               |         |
|---------------|---------|
| ANOVA summary |         |
| F             | 25.86   |
| P value       | <0.0001 |
| P value su    | ****    |
| Significant   | Yes     |
| R squared     | 0.795   |

|           |      |
|-----------|------|
| Number of | 1    |
| Number of | 6    |
| Alpha     | 0.05 |

| Tukey's m   | Mean Diff. | 95.00% CI Below thre | Summary | Adjusted P Value |
|-------------|------------|----------------------|---------|------------------|
| Control vs. | -2.859     | -3.897 to 0          | ****    | <0.0001 A-B      |
| Control vs. | -0.9879    | -2.026 to 0          | ns      | 0.0658 A-C       |
| Control vs. | -0.05867   | -1.097 to 0          | ns      | 0.9985 A-D       |
| TNF vs. Th  | 1.871      | 0.8323 to 2          | ***     | 0.0003 B-C       |
| TNF vs. Th  | 2.8        | 1.761 to 3           | ****    | <0.0001 B-D      |
| TNF-Cin40   | 0.9292     | -0.1092 to No        | ns      | 0.0897 C-D       |

| Test detail             | Mean 1 | Mean 2 | Mean Diff. | SE of diff. | n1 | n2 | q      | DF |
|-------------------------|--------|--------|------------|-------------|----|----|--------|----|
| Control vs. TNF         | 1      | 3.859  | -2.859     | 0.371       | 6  | 6  | 10.9   | 20 |
| Control vs. TNF + C     | 1      | 1.988  | -0.9879    | 0.371       | 6  | 6  | 3.766  | 20 |
| Control vs. TNF + C + I | 1      | 1.059  | -0.05867   | 0.371       | 6  | 6  | 0.2236 | 20 |
| TNF vs. TNF + C         | 3.859  | 1.988  | 1.871      | 0.371       | 6  | 6  | 7.131  | 20 |
| TNF vs. TNF + C + I     | 3.859  | 1.059  | 2.8        | 0.371       | 6  | 6  | 10.67  | 20 |
| TNF + C vs. TNF + C + I | 1.988  | 1.059  | 0.9292     | 0.371       | 6  | 6  | 3.542  | 20 |

|    | Control | TNF   | TNF-Cin40 | Cin40  |
|----|---------|-------|-----------|--------|
| RN | 1       | 3.099 | 2.044     | 1.542  |
|    | 1       | 4.578 | 1.901     | 0.48   |
|    | 1       | 3.149 | 2.53      | 0.484  |
|    | 1       | 7.751 | 1.984     | 0.89   |
|    | 1       | 5.778 | 3.187     | 1.004  |
|    | 1       | 4.993 | 2.976     | 1.1124 |

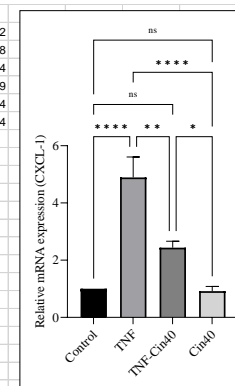Table Anal HT-29-CXCL1

|           |     |
|-----------|-----|
| Data sets | A-D |
|-----------|-----|

|               |         |
|---------------|---------|
| ANOVA summary |         |
| F             | 23.42   |
| P value       | <0.0001 |
| P value su    | ****    |
| Significant   | Yes     |
| R squared     | 0.7784  |

| ANOVA       | SS    | DF | MS     | F (DFn, Df P value   |
|-------------|-------|----|--------|----------------------|
| Treatment   | 61.99 | 3  | 20.66  | F (3, 20) = P<0.0001 |
| Residual (v | 17.64 | 20 | 0.8822 |                      |
| Total       | 79.63 | 23 |        |                      |

|  |              |  |
|--|--------------|--|
|  | Data summary |  |
|  | Number of    |  |
|  | Number of    |  |

|           |  |
|-----------|--|
| Number of |  |
| Number of |  |
| Alpha     |  |

| Tukey's m   | Mean Diff. | 95.00% CI         | Below thr | Summary | Adjusted P Value |
|-------------|------------|-------------------|-----------|---------|------------------|
| Control vs. | -3.891     | -5.409 to -2.385  | Yes       | ****    | <0.0001 A-B      |
| Control vs. | -1.437     | -2.955 to 0       | No        | ns      | 0.0675 A-B       |
| Control vs. | 0.08127    | -1.437 to 1       | No        | ns      | 0.9988 A-D       |
| TNF vs. TN  | 2.454      | 0.9365 to 3.973   | Yes       | **      | 0.0011 B-C       |
| TNF vs. Ci  | 3.973      | 2.455 to 5.495    | Yes       | ****    | <0.0001 B-D      |
| TNF-Cin40   | 1.518      | 0.004302 to 3.031 | Yes       | *       | 0.0499 C-D       |

| Test detail            | Mean 1 | Mean 2 | Mean Diff. | SE of diff. | n1 | n2 | q      | DF |
|------------------------|--------|--------|------------|-------------|----|----|--------|----|
| Control vs. TNF        | 1      | 4.891  | -3.891     | 0.5423      | 6  | 6  | 10.15  | 20 |
| Control vs. TNF-Cin40  | 1      | 2.437  | -1.437     | 0.5423      | 6  | 6  | 3.747  | 20 |
| Control vs. TNF vs. TN | 1      | 0.9187 | 0.08127    | 0.5423      | 6  | 6  | 0.2119 | 20 |
| TNF vs. TN             | 4.891  | 2.437  | 2.454      | 0.5423      | 6  | 6  | 6.429  | 20 |
| TNF vs. Ci             | 4.891  | 0.9187 | 3.973      | 0.5423      | 6  | 6  | 10.36  | 20 |
| TNF-Cin40              | 2.437  | 0.9187 | 1.518      | 0.5423      | 6  | 6  | 3.959  | 20 |

## HT-29 PPAR $\gamma$ protein expression, SiRNA treated IL8, CXCL1 mRNA:

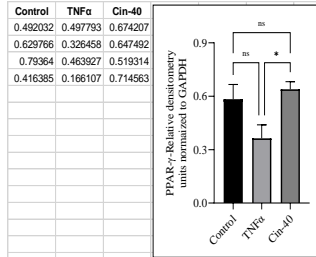

Table Anal HT-29-Cin-PPAR $\gamma$ -Western Blot  
Data sets: A-C

|                  |        |
|------------------|--------|
| ANOVA summary    |        |
| F                | 4.422  |
| P value          | 0.046  |
| P value su *     |        |
| Significant: Yes |        |
| R squared        | 0.4956 |

| ANOVA ta SS  | DF     | MS | F (DFn, DfP value)           |
|--------------|--------|----|------------------------------|
| Treatment    | 0.1694 | 2  | 0.08471 F (2, 9) = 4P=0.0460 |
| Residual (i) | 0.1724 | 9  | 0.01915                      |
| Total        | 0.3418 | 11 |                              |

|              |      |
|--------------|------|
| Data summary |      |
| Number of:   | 3    |
| Number of:   | 12   |
| Number of:   | 1    |
| Number of:   | 3    |
| Alpha        | 0.05 |

|                                                                    |                                      |
|--------------------------------------------------------------------|--------------------------------------|
| Tukey's m Mean Diff. 95.00% CI Below thre Summary Adjusted P Value |                                      |
| Control vs.:                                                       | 0.2194 -0.05385 to No ns 0.117 A-B   |
| Control vs.:                                                       | -0.05594 -0.3292 to No ns 0.8362 A-C |
| TNFα vs. C                                                         | -0.2753 -0.5486 to Yes * 0.0484 B-C  |

| Test detail Mean 1 | Mean 2 | Mean Diff. | SE of diff. | n1      | n2 | q | DF     |
|--------------------|--------|------------|-------------|---------|----|---|--------|
| Control vs.:       | 0.583  | 0.3636     | 0.2194      | 0.09786 | 4  | 4 | 3.17   |
| Control vs.:       | 0.583  | 0.6389     | -0.05594    | 0.09786 | 4  | 4 | 0.8083 |
| TNFα vs. C         | 0.3636 | 0.6389     | -0.2753     | 0.09786 | 4  | 4 | 3.979  |

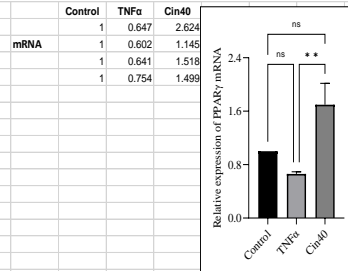

Table Anal HT-29-TNF-Cin-PPAR $\gamma$ -mRNA  
Data sets: A-C

|                  |        |
|------------------|--------|
| ANOVA summary    |        |
| F                | 8.04   |
| P value          | 0.0099 |
| P value su **    |        |
| Significant: Yes |        |
| R squared        | 0.6411 |

| ANOVA ta SS  | DF    | MS | F (DFn, DfP value)         |
|--------------|-------|----|----------------------------|
| Treatment    | 2.23  | 2  | 1.115 F (2, 9) = 4P=0.0099 |
| Residual (i) | 1.248 | 9  | 0.1387                     |
| Total        | 3.478 | 11 |                            |

|              |      |
|--------------|------|
| Data summary |      |
| Number of:   | 3    |
| Number of:   | 12   |
| Number of:   | 1    |
| Number of:   | 3    |
| Alpha        | 0.05 |

|                                                                    |                                       |
|--------------------------------------------------------------------|---------------------------------------|
| Tukey's m Mean Diff. 95.00% CI Below thre Summary Adjusted P Value |                                       |
| Control vs.:                                                       | 0.339 -0.3962 to No ns 0.4363 A-B     |
| Control vs.:                                                       | -0.6965 -1.432 to 0 No ns 0.0629 A-C  |
| TNFα vs. C                                                         | -1.036 -1.771 to -4 Yes ** 0.0087 B-C |

| Test detail Mean 1 | Mean 2 | Mean Diff. | SE of diff. | n1     | n2 | q | DF    |
|--------------------|--------|------------|-------------|--------|----|---|-------|
| Control vs.:       | 1      | 0.661      | 0.339       | 0.2633 | 4  | 4 | 1.821 |
| Control vs.:       | 1      | 1.697      | -0.6965     | 0.2633 | 4  | 4 | 3.741 |
| TNFα vs. C         | 0.661  | 1.697      | -1.036      | 0.2633 | 4  | 4 | 5.562 |

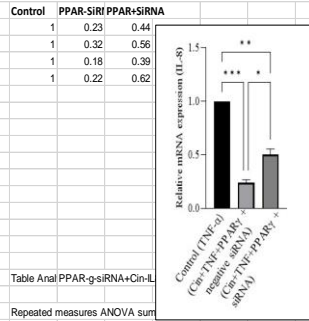

Table Anal PPAR- $\gamma$ -siRNA+Cin-IL  
Data sets: A-C

|                  |         |
|------------------|---------|
| ANOVA summary    |         |
| F                | 156.3   |
| P value          | <0.0001 |
| P value su ***   |         |
| Significant: Yes |         |
| R squared        | 0.9812  |

| ANOVA ta SS    | DF      | MS | F (DFn, DfP value)            |
|----------------|---------|----|-------------------------------|
| Treatment      | 1.199   | 2  | 0.5994 F (1, 48, 4P<0.0001    |
| Individual (i) | 0.02113 | 3  | 0.007044 F (3, 6) = 4P=0.2411 |
| Residual (i)   | 0.02302 | 6  | 0.003836                      |
| Total          | 1.243   | 11 |                               |

|              |   |
|--------------|---|
| Data summary |   |
| Number of:   | 3 |
| Number of:   | 4 |
| Number of:   | 0 |

|            |      |
|------------|------|
| Number of: | 1    |
| Number of: | 3    |
| Alpha      | 0.05 |

|                                                                    |                                      |
|--------------------------------------------------------------------|--------------------------------------|
| Tukey's m Mean Diff. 95.00% CI Below thre Summary Adjusted P Value |                                      |
| Control(TN                                                         | 0.7625 0.6390 to (Yes *** 0.0002 A-B |
| Control(TN                                                         | 0.4975 0.2761 to (Yes ** 0.0053 A-C  |
| Column B                                                           | -0.265 -0.4554 to Yes * 0.0205 B-C   |

| Test detail Mean 1 | Mean 2 | Mean Diff. | SE of diff. | n1      | n2 | q | DF    |
|--------------------|--------|------------|-------------|---------|----|---|-------|
| Control(TN         | 1      | 0.2375     | 0.7625      | 0.02955 | 4  | 4 | 36.5  |
| Control(TN         | 1      | 0.5025     | 0.4975      | 0.05297 | 4  | 4 | 13.28 |
| Column B           | 0.2375 | 0.5025     | -0.265      | 0.04555 | 4  | 4 | 8.227 |

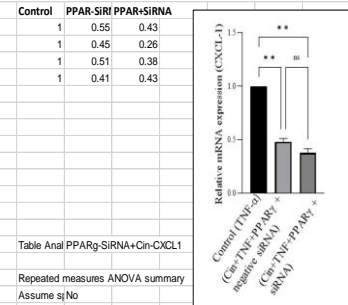

Table Anal PPAR- $\gamma$ -siRNA+Cin-CXCL1

|                  |         |
|------------------|---------|
| ANOVA summary    |         |
| Assume s/No      |         |
| F                | 147.7   |
| P value          | <0.0001 |
| P value su ****  |         |
| Statistical: Yes |         |
| Geisser-Gi       | 0.8688  |
| R squared        | 0.9801  |

| ANOVA ta SS    | DF     | MS | F (DFn, DfP value)            |
|----------------|--------|----|-------------------------------|
| Treatment      | 0.8961 | 2  | 0.448 F (1, 738, 4P<0.0001    |
| Individual (i) | 0.0127 | 3  | 0.004233 F (3, 6) = 4P=0.3323 |
| Residual (i)   | 0.0182 | 6  | 0.003033                      |
| Total          | 0.927  | 11 |                               |

|              |   |
|--------------|---|
| Data summary |   |
| Number of:   | 3 |
| Number of:   | 4 |
| Number of:   | 0 |

|            |      |
|------------|------|
| Number of: | 1    |
| Number of: | 3    |
| Alpha      | 0.05 |

|                                                                    |                                    |
|--------------------------------------------------------------------|------------------------------------|
| Tukey's m Mean Diff. 95.00% CI Below thre Summary Adjusted P Value |                                    |
| Column A                                                           | 0.52 0.3901 to (Yes ** 0.001 A-B   |
| Column A                                                           | 0.625 0.4574 to (Yes ** 0.0012 A-C |
| Column B                                                           | 0.105 -0.08071 to No ns 0.1887 B-C |

| Test detail Mean 1 | Mean 2 | Mean Diff. | SE of diff. | n1      | n2 | q | DF    |
|--------------------|--------|------------|-------------|---------|----|---|-------|
| Column A           | 1      | 0.48       | 0.52        | 0.03109 | 4  | 4 | 23.65 |
| Column A           | 1      | 0.375      | 0.625       | 0.0401  | 4  | 4 | 22.04 |
| Column B           | 0.48   | 0.375      | 0.105       | 0.04444 | 4  | 4 | 3.341 |

### HT-29 SiRNA treated PPAR $\gamma$ protein and mRNA expression:

| Control  | PARg-siRNA |
|----------|------------|
| 0.658262 | 0.175008   |
| 0.737216 | 0.363874   |
| 0.693641 | 0.214742   |
| 0.725567 | 0.288437   |

  

Relative expression of PPAR- $\gamma$  mRNA compared to vehicle

Control (PPAR- $\gamma$  -ve siRNA)

PPAR- $\gamma$ -siRNA

  

| Column B | Data Set-B |
|----------|------------|
| vs.      | vs.        |
| Column A | Data Set-A |

  

|                             |                       |
|-----------------------------|-----------------------|
| Unpaired t test             |                       |
| P value                     | <0.0001               |
| P value su                  | ****                  |
| Significant                 | Yes                   |
| One- or tw                  | Two-tailed            |
| t, df                       | t=9.780, df=6         |
| How big is the difference?  |                       |
| Mean of cc                  | 0.7037                |
| Mean of cc                  | 0.2605                |
| Difference                  | -0.4432 $\pm$ 0.04531 |
| 95% confic                  | -0.5540 to -0.3323    |
| R squared                   | 0.941                 |
| F test to compare variances |                       |
| F, DFn, Df                  | 5.540, 3, 3           |
| P value                     | 0.1934                |
| P value su ns               |                       |
| Significant                 | No                    |
| Data analyzed               |                       |
| Sample siz                  | 4                     |
| Sample siz                  | 4                     |

  

| Control | PARg-siRNA |
|---------|------------|
| 1       | 0.23       |
| 1       | 0.14       |
| 1       | 0.117      |
| 1       | 0.192      |

  

Relative mRNA expression (PPAR- $\gamma$ )

Control

PPAR-g-siRNA

  

| Column B | PPARg-siRNA |
|----------|-------------|
| vs.      | vs.         |
| Column A | Control     |

  

|                             |                       |
|-----------------------------|-----------------------|
| Unpaired t test             |                       |
| P value                     | <0.0001               |
| P value su                  | ****                  |
| Significant                 | Yes                   |
| One- or tw                  | Two-tailed            |
| Welch-cor                   | t=32.58, df=3.000     |
| How big is the difference?  |                       |
| Mean of cc                  | 1                     |
| Mean of cc                  | 0.1698                |
| Difference                  | -0.8303 $\pm$ 0.02548 |
| 95% confic                  | -0.9113 to -0.7492    |
| R squared                   | 0.9972                |
| F test to compare variances |                       |
| F, DFn, Df                  | Infinity, 3, 3        |
| P value                     | <0.0001               |
| P value su                  | ****                  |
| Significant                 | Yes                   |
| Data analyzed               |                       |
| Sample siz                  | 4                     |
| Sample siz                  | 4                     |

## PPAR $\gamma$ Promoter assay (12 h & 24 h):

| No vector control | PPRE | PPRE-Cin40 | PPRE-GW1929 | PPRE-GW9662 |  |  |  |  |  | No vector control | PPRE | PPRE-Cin40 | PPRE-GW1929 | PPRE-GW9662 |  |  |  |  |  |  |
|-------------------|------|------------|-------------|-------------|--|--|--|--|--|-------------------|------|------------|-------------|-------------|--|--|--|--|--|--|
| 551               | 618  | 2520       | 1558        | 613         |  |  |  |  |  | 551               | 1745 | 4845       | 3958        | 1663        |  |  |  |  |  |  |
| 240               | 769  | 1915       | 1420        | 951         |  |  |  |  |  | 478               | 1468 | 3944       | 4121        | 1781        |  |  |  |  |  |  |
| 360               | 713  | 2103       | 3344        | 729         |  |  |  |  |  | 729               | 1135 | 6471       | 5022        | 1803        |  |  |  |  |  |  |
| 272               | 744  | 1833       | 1961        | 986         |  |  |  |  |  | 523               | 968  | 3625       | 4195        | 2155        |  |  |  |  |  |  |
| 29                | 542  | 1559       | 1164        | 705         |  |  |  |  |  | 64                | 770  | 3924       | 4020        | 1473        |  |  |  |  |  |  |
| 633               | 852  | 1874       | 1527        | 616         |  |  |  |  |  | 676               | 1121 | 5958       | 4536        | 2138        |  |  |  |  |  |  |

  

Table Anal HT-29-PPAR $\gamma$ -Promoter assay-12hr  
Data sets: A-E

ANOVA summary

F 19.6

P value <0.0001

P value su \*\*\*\*

Significant Yes

R squared 0.7582

Brown-Forsythe test

F (DFn, Df) 1.192 (4, 25)

P value 0.3388

P value su ns

Are SDs si No

Bartlett's test

Bartlett's s 21.7

P value 0.0002

P value su \*\*\*

Are SDs si Yes

ANOVA ta SS DF MS F (DFn, Df) P value

Treatment 12679913 4 3169978 F (4, 25) = 19.60 P<0.0001

Residual (v 4043694 25 161748

Total 16723607 29

Data summary

Number of 5

Number of 30

Number of 1

Number of 10

Alpha 0.05

Table Anal HT-29-PPAR $\gamma$ -promoter assay 24 hr

Repeated measures ANOVA summary

Assume si No

F 78.32

P value <0.0001

P value su \*\*\*\*

Statistical Yes

Geisser-Gi 0.3431

R squared 0.94

Was the matching effective?

F 2.477

P value 0.0668

P value su ns

Is there sig No

R squared 0.03583

ANOVA ta SS DF MS F (DFn, Df) P value

Treatment 87878622 4 21969656 F (1.373, 6) P<0.0001

Individual ( 3474088 5 694818 F (5, 20) = P=0.0668

Residual ( 5610517 20 280526

Total 96963227 29

Data summary

Number of 5

Number of 6

Number of 0

Number of 1

Number of 10

Alpha 0.05

Tukey's m Mean Diff. 95.00% CI Below threshold Summary Adjusted P Value

No vector ( -697.7 -1238 to -1 Yes \* 0.0182 A-B

No vector ( -4291 -5988 to -2 Yes \*\*\* 0.0009 A-C

No vector ( -3805 -4305 to -3 Yes \*\*\*\* <0.0001 A-D

No vector ( -1332 -1682 to -9 Yes \*\*\* 0.0001 A-E

PPRE vs. -3593 -5551 to -1 Yes \*\* 0.0039 B-C

PPRE vs. -3108 -4075 to -2 Yes \*\*\* 0.0003 B-D

PPRE vs. -634.3 -1393 to 1 No ns 0.0947 B-E

PPRE-Cin 485.8 -952.7 to 1 No ns 0.6758 C-D

PPRE-Cin 2959 1046 to 48 Yes \*\* 0.0083 C-E

PPRE-GW 2473 1816 to 31 Yes \*\*\* 0.0001 D-E

Test detail Mean 1 Mean 2 Mean Diff. SE of diff. n1 n2 q DF

No vector ( 503.5 1201 -697.7 134.7 6 6 7.323 5

No vector ( 503.5 4795 -4291 423 6 6 14.35 5

No vector ( 503.5 4309 -3805 124.7 6 6 43.16 5

No vector ( 503.5 1836 -1332 87.3 6 6 21.58 5

PPRE vs. 1201 4795 -3593 488 6 6 10.41 5

PPRE vs. 1201 4309 -3108 241.1 6 6 18.23 5

PPRE vs. 1201 1836 -634.3 189.2 6 6 4.741 5

PPRE-Cin 4795 4309 485.8 358.8 6 6 1.916 5

PPRE-Cin 4795 1836 2959 476.8 6 6 8.776 5

PPRE-GW 4309 1836 2473 163.8 6 6 21.36 5
